# Supplementary material for: Development and Validation of a High-Performance Liquid Chromatography–Tandem Mass Spectrometry Method to Determine Promethazine and Its Metabolites in Edible Tissues of Swine
Source: MDPI journal article supplement (doi:10.3390/foods12112180), 2023-05-29
Supplement: s1 [file s1]

**Table S1.** Reports of analysis methods on PMZ and its metabolites in edible animal tissues.

| Analytes                              | Target tissue                             | Equipment            | LOD, LOQ                                                                                                                                                                                                                                               | Reference               |
|---------------------------------------|-------------------------------------------|----------------------|--------------------------------------------------------------------------------------------------------------------------------------------------------------------------------------------------------------------------------------------------------|-------------------------|
| PMZ,<br>PMZSO,<br>Nor1PMZ             | Swine<br>muscle, liver,<br>kidney, fat    | LC-MS/MS             | <p>LOD: muscle, liver, and kidney 0.05 µg/kg for PMZ, PMZSO, 0.1µg/kg for Nor1PMZ.</p> <p>LOQ: muscle, liver, and kidney 0.1 µg/kg for PMZ and PMZSO, 0.5 µg/kg for Nor1PMZ.</p> <p>LOD and LOQ of fat, 0.05 µg/kg and 0.1 µg/kg for all analytes.</p> | This study              |
| 5 phenothiazines, including PMZ       | Fish                                      | LC-MS/MS             | <p>LOD: 0.1ng/g</p> <p>LOQ: 0.5ng/g</p>                                                                                                                                                                                                                | Li et al., 2010 [33]    |
| 24 tranquillizer drugs, including PMZ | fish and fishery product                  | UPLC-Q-Orbitrap HRMS | LOQ: 0.5µg/kg                                                                                                                                                                                                                                          | Gao et al., 2018 [47]   |
| PMZ, Chlorpromazine                   | Poultry Eggs                              | LC-MS/MS             | LOD: for PMZ 0.05µg/kg, LOQ: for PMZ 0.17µg/k                                                                                                                                                                                                          | Yang et al., 2020 [48]  |
| 10 sedatives, including PMZ           | Pork, kidney                              | UPLC-MS/MS           | LOD: 0.5µg/kg<br>LOQ: 1µg/kg                                                                                                                                                                                                                           | Sun et al.,2010 [49]    |
| Tranquilizers, including PMZ          | Swine muscle, liver, and kidney           | LC-MS/MS             | LOD: 0.06-0.1g/kg<br>LOQ: 0.2-0.41g/kg                                                                                                                                                                                                                 | He et al., 2012 [34]    |
| PMZ                                   | Meat of bovine, porcine and ovine         | LC-MS/MS             | LOD: 0.1µg/kg<br>LOQ: 0.3µg/kg                                                                                                                                                                                                                         | Li et al., 2019 [50]    |
| 15 sedatives, including PMZ           | Meat of bovine and poultry, porcine liver | UPLC-MS/MS           | LOD: 1µg/kg;<br>LOQ: 3µg/kg                                                                                                                                                                                                                            | Wang et al., 2020 [41]  |
| PMZ, PMZSO                            | Meat of bovine and poultry, porcine liver | UPLC-Q-TOF/MS        | LOD: PMZ 2µg/kg, PMZSO 0.5µg/kg<br>LOQ: PMZ 6µg/kg, PMZSO 1.5 µg/kg                                                                                                                                                                                    | Wang et al., 2021 [51]  |
| PMZ                                   | Pork product                              | LC-MS/MS             | LOD: PMZ 0.3ng/g, LOQ : PMZ 1 ng/g                                                                                                                                                                                                                     | Liang et al., 2016 [52] |
| PMZ, PMZSO                            | Porcine meat, liver, kidney               | LC-MS/MS             | LOD: PMZ 0.04µg/kg, PMZSO 0.17µg/kg<br>LOQ: PMZ 0.12µg/kg, PMZSO 0.51µg/kg                                                                                                                                                                             | Chen et al., 2022 [43]  |

|                        |                   |         |                                        |                          |
|------------------------|-------------------|---------|----------------------------------------|--------------------------|
| PMZ,<br>Chlorpromazine | Porcine<br>kidney | HPLC-UV | LOD: PMZ and<br>Chlorpromazine 10µg/kg | Fan et al.,<br>2005 [21] |
|------------------------|-------------------|---------|----------------------------------------|--------------------------|

## References

21. Chen, P.; Fan, S.; Huang, L.; Yuan, Z. Establishment of detection method for chlorpromazine and promethazine residues in swine kidney. *Chin. J. Vet. Med.* **2005**, *4*, 412–413, 416.
33. Li, C.; Yue, Z.; Zhao, F.; Hua, H.; Han, R.; Li, L. Study on the Determination of Phenothiazide Residues in Aquatic Products by Liquid Chromatography Tandem Mass Spectrometry. *Chin. J. Vet. Med.* **2010**, *3*, 384–387, 392.
34. He, L.; Wang, J.; Zhang, G.; Liu, R.; Fang, B. Simultaneous Determination of Tranquilizers and Carazolol Residues in Swine Tissues by Liquid Chromatography-Tandem Mass Spectrometry. *Anal. Lett.* **2012**, *45*, 1377–1389.
41. Wang, j.; Ye, J.; Wang, X.; Zhong, S.; Chen, Q. Determination of 15 sedative drug residues in livestock and poultry meat by ultra-high performance liquid chromatography tandem mass spectrometry. *Farm Prod. Process.* **2020**, *7*, 45–49.
43. Chen, X.; Zhou, J.; Jin, M. Determination of 4 chlorpromazine and promethazine and their metabolites in swine tissues by liquid chromatography-tandem mass spectrometry with isotope internal standard dilution technique. *J. Hyg. Res.* **2022**, *51*, 476–482.
47. Li, R.; Yang, L.; Zhang, P.; Luo, Y.; Zhang, P.; Gao, Y. Rapid screening of 24 tranquillizer drugs in fish and fishery products by ultra-high performance liquid chromatography-quadrupole/electrostatic field orbitrap high resolution mass spectroscopy. *Chin. J. of Chromatogr.*, **2018**, *36*, 125–135.
48. Wang, K.; Cao, Q.; Zhao, L.; Chen L.; Gao, Q.; Yang, L. Determination of Promethazine and Chlorpromazine in Poultry Eggs by High Performance Liquid Chromatography Tandem Mass Spectrometry. *The Food Ind.*, **2020**, *41*, 299–302.
49. Sun, L.; Zhang, L.; Xu, Q.; Wang, S.; Wang, X. Determination of ten sedative residues in pork and kidney by ultra performance liquid chromatography- tandem mass spectrometry. *Chin. J. of Chromatogr.*, **2010**, *28*, 38–42.
50. Li, Z.; Li, H.; Ma, Y.; Wang, S.; Ren, N.; Guo, W.; Guo, C.; Li, Y. High Performance Liquid Chromatography-Tandem Mass Spectrometry Detection of Promethazine in Animal-Derived Foods. *Food Sci.*, **2019**, *40*, 320–324.
51. Wang, J.; Ye, J.; Zhong, S.; Wang, X.; Chen Q. Determination of Antihistamine Residues in Livestock and Poultry Products by Ultra Performance Liquid Chromatography—Quadrupole—Time of Flight Mass Spectrometry. *Sci. Technol. of Food Ind.*, **2021**, *42*, 250–256, 264.
52. Liang, Y.; Li, Y.; Guo, X.; Li, R.; Gao, L.; Wang, J.; Fu, G.; Wan, Y. Determination of chlorpromazine, promethazine, and vancomycin in pork product by liquid chromatography-mass spectrometry. *Cereal Feed Ind.*, **2016**, *346*, 69–73.

Table S2. Original Data of Recovery and precision of spiked blank samples.

| Tissues | Analyte | Concentration ( $\mu\text{g/kg}$ ) |                          |       |       | Recovery ( $\bar{X}\pm\text{S.D.}$ )(n=6) (%) |                   |                   | Intra-day RSD (%) (n=6) |          |           | Inter-day RSD (%) |
|---------|---------|------------------------------------|--------------------------|-------|-------|-----------------------------------------------|-------------------|-------------------|-------------------------|----------|-----------|-------------------|
|         |         | Spiked                             | Found ( $\bar{X}$ , n=6) |       |       | Batch I                                       | Batch II          | Batch III         | Batch I                 | Batch II | Batch III |                   |
| Muscle  | PMZ     | 0.1                                | 0.077                    | 0.082 | 0.082 | 77.13 $\pm$ 5.44                              | 81.73 $\pm$ 9.12  | 82.35 $\pm$ 8.82  | 7.05                    | 11.16    | 10.71     | 9.86              |
|         |         | 5                                  | 5.00                     | 4.58  | 4.72  | 100.00 $\pm$ 2.82                             | 91.62 $\pm$ 2.92  | 94.47 $\pm$ 4.51  | 2.82                    | 3.18     | 4.78      | 5.13              |
|         |         | 50                                 | 52.33                    | 47.15 | 50.08 | 104.55 $\pm$ 5.98                             | 94.37 $\pm$ 3.56  | 100.27 $\pm$ 3.84 | 5.72                    | 3.78     | 3.83      | 6.12              |
|         | PMZSO   | 0.1                                | 0.10                     | 0.10  | 0.099 | 102.95 $\pm$ 7.21                             | 103.47 $\pm$ 8.33 | 99.22 $\pm$ 10.31 | 7.00                    | 8.06     | 10.39     | 8.26              |
|         |         | 5                                  | 4.64                     | 5.31  | 5.17  | 92.82 $\pm$ 1.97                              | 106.33 $\pm$ 3.20 | 103.28 $\pm$ 7.97 | 2.12                    | 3.01     | 7.72      | 7.62              |
|         |         | 50                                 | 43.12                    | 45.23 | 43.95 | 86.25 $\pm$ 2.08                              | 90.45 $\pm$ 2.99  | 87.88 $\pm$ 2.84  | 2.42                    | 3.30     | 3.24      | 3.49              |
|         | Nor1PMZ | 0.5                                | 0.52                     | 0.45  | 0.47  | 103.70 $\pm$ 7.89                             | 90.03 $\pm$ 7.53  | 94.33 $\pm$ 8.84  | 7.61                    | 8.36     | 9.37      | 10.02             |
|         |         | 5                                  | 4.75                     | 4.81  | 5.04  | 95.00 $\pm$ 6.20                              | 96.10 $\pm$ 3.50  | 100.73 $\pm$ 4.97 | 6.52                    | 3.64     | 4.93      | 5.53              |
|         |         | 50                                 | 45.92                    | 55.58 | 53.70 | 91.85 $\pm$ 2.97                              | 111.17 $\pm$ 3.66 | 107.43 $\pm$ 6.38 | 3.24                    | 3.29     | 5.95      | 9.27              |
| Liver   | PMZ     | 0.1                                | 0.10                     | 0.10  | 0.097 | 101.02 $\pm$ 10.90                            | 104.15 $\pm$ 7.39 | 96.72 $\pm$ 6.09  | 10.79                   | 7.10     | 6.29      | 8.42              |
|         |         | 5                                  | 5.37                     | 5.13  | 4.35  | 107.17 $\pm$ 2.48                             | 102.72 $\pm$ 8.20 | 87.08 $\pm$ 4.55  | 2.32                    | 7.99     | 5.22      | 10.42             |
|         |         | 50                                 | 44.37                    | 45.42 | 44.53 | 88.75 $\pm$ 4.44                              | 90.82 $\pm$ 5.07  | 89.10 $\pm$ 3.87  | 5.00                    | 5.58     | 4.35      | 4.84              |
|         | PMZSO   | 0.1                                | 0.098                    | 0.10  | 0.098 | 97.52 $\pm$ 7.88                              | 101.22 $\pm$ 5.12 | 97.88 $\pm$ 9.62  | 8.08                    | 5.06     | 9.83      | 7.58              |
|         |         | 5                                  | 4.58                     | 5.01  | 4.54  | 91.52 $\pm$ 6.05                              | 100.23 $\pm$ 3.94 | 90.72 $\pm$ 4.96  | 6.61                    | 3.93     | 5.46      | 6.89              |
|         |         | 50                                 | 50.02                    | 48.23 | 52.20 | 100.02 $\pm$ 4.42                             | 96.48 $\pm$ 5.13  | 104.33 $\pm$ 1.86 | 4.42                    | 5.31     | 1.78      | 5.10              |
|         | Nor1PMZ | 0.5                                | 0.49                     | 0.48  | 0.47  | 97.48 $\pm$ 8.35                              | 95.41 $\pm$ 6.61  | 94.17 $\pm$ 6.01  | 8.56                    | 6.92     | 6.39      | 7.47              |
|         |         | 5                                  | 4.57                     | 4.76  | 4.93  | 91.28 $\pm$ 5.03                              | 95.28 $\pm$ 8.94  | 98.50 $\pm$ 6.85  | 5.51                    | 9.38     | 6.95      | 7.76              |
|         |         | 50                                 | 47.32                    | 49.33 | 50.40 | 94.63 $\pm$ 3.85                              | 98.67 $\pm$ 4.29  | 100.88 $\pm$ 3.60 | 4.07                    | 4.35     | 3.57      | 4.59              |
| Kidney  | PMZ     | 0.1                                | 0.086                    | 0.088 | 0.094 | 86.18 $\pm$ 4.29                              | 88.05 $\pm$ 2.53  | 94.36 $\pm$ 7.33  | 4.98                    | 2.87     | 7.76      | 6.70              |
|         |         | 5                                  | 4.27                     | 4.48  | 4.22  | 85.48 $\pm$ 5.05                              | 89.63 $\pm$ 4.34  | 84.30 $\pm$ 3.63  | 5.91                    | 4.84     | 4.30      | 5.45              |
|         |         | 50                                 | 45.88                    | 44.78 | 45.43 | 91.80 $\pm$ 2.77                              | 89.60 $\pm$ 5.68  | 90.83 $\pm$ 1.68  | 3.02                    | 6.34     | 1.84      | 4.02              |
|         | PMZSO   | 0.1                                | 0.10                     | 0.095 | 0.097 | 100.22 $\pm$ 10.67                            | 94.52 $\pm$ 9.60  | 97.07 $\pm$ 6.56  | 10.16                   | 10.65    | 6.76      | 9.14              |
|         |         | 5                                  | 5.02                     | 5.23  | 5.10  | 100.60 $\pm$ 4.31                             | 104.53 $\pm$ 5.88 | 101.95 $\pm$ 3.11 | 4.29                    | 5.63     | 3.05      | 4.55              |
|         |         | 50                                 | 47.80                    | 49.58 | 45.47 | 95.62 $\pm$ 1.70                              | 99.17 $\pm$ 4.00  | 90.90 $\pm$ 2.19  | 1.77                    | 4.03     | 2.04      | 4.58              |
|         | Nor1PMZ | 0.5                                | 0.47                     | 0.48  | 0.50  | 93.75 $\pm$ 6.36                              | 95.92 $\pm$ 11.94 | 99.15 $\pm$ 5.35  | 6.79                    | 12.45    | 5.39      | 8.62              |
|         |         | 5                                  | 5.12                     | 4.93  | 5.22  | 102.42 $\pm$ 7.24                             | 97.40 $\pm$ 10.32 | 104.30 $\pm$ 6.13 | 7.07                    | 10.59    | 5.88      | 7.86              |
|         |         | 50                                 | 52.18                    | 47.95 | 49.70 | 104.22 $\pm$ 5.79                             | 95.92 $\pm$ 6.93  | 99.32 $\pm$ 2.69  | 5.56                    | 7.23     | 2.71      | 6.32              |

|     |        |     |       |       |       |             |              |              |      |       |       |      |
|-----|--------|-----|-------|-------|-------|-------------|--------------|--------------|------|-------|-------|------|
| Fat | PMZ    | 0.1 | 0.097 | 0.10  | 0.096 | 96.87±7.32  | 100.37±7.60  | 96.13±9.16   | 7.55 | 7.57  | 9.53  | 7.63 |
|     |        | 5   | 4.88  | 5.03  | 5.20  | 97.62±3.58  | 100.50±3.12  | 104.05±3.30  | 3.67 | 3.10  | 3.17  | 4.12 |
|     |        | 50  | 52.35 | 48.83 | 50.33 | 104.55±6.95 | 97.63±5.47   | 100.53±5.67  | 6.65 | 5.60  | 5.64  | 6.40 |
|     | PMZSO  | 0.1 | 0.094 | 0.10  | 0.095 | 94.02±6.79  | 100.55±10.52 | 94.73±8.52   | 7.22 | 10.46 | 9.00  | 9.07 |
|     |        | 5   | 4.23  | 4.43  | 4.90  | 84.65±3.88  | 88.66±3.74   | 97.85±5.20   | 4.59 | 4.22  | 5.32  | 7.73 |
|     |        | 50  | 46.30 | 45.48 | 46.40 | 92.56±3.32  | 90.93±4.65   | 92.82±3.00   | 3.59 | 5.11  | 3.23  | 4.79 |
|     | NorPMZ | 0.1 | 0.10  | 0.096 | 0.10  | 100.47±9.91 | 96.07±8.68   | 101.38±11.00 | 9.86 | 9.04  | 10.85 | 9.68 |
|     |        | 5   | 5.00  | 5.22  | 5.26  | 100.13±6.51 | 104.17±7.68  | 105.38±5.49  | 6.50 | 7.37  | 5.21  | 6.37 |
|     |        | 50  | 49.38 | 47.88 | 43.43 | 98.73±4.93  | 92.25±7.07   | 86.88±6.87   | 4.99 | 7.66  | 7.90  | 7.53 |
